# Supplementary material for: Quality of life among caregivers of asthmatic children attending pulmonology clinics at Hamad General Hospital, Qatar
Source: PubMed Central journal article supplement — SAGE Open Med. 2020 Nov 24;8:2050312120973500. doi: 10.1177/2050312120973500 (PMC7691908; doi:10.1177/2050312120973500), 2020-11-24
Supplement: sj-pdf-1-smo-10.1177_2050312120973500.pdf [file sj-pdf-1-smo-10.1177_2050312120973500.pdf]

بسم الله الرحمن الرحيم  
اقترح بحثي

الإكتئاب، وجودة الحياة والعوامل المصاحبة لها بين مقدمي الرعاية للأطفال المصابين بالربو المتكررين  
على عيادات الأمراض الصدرية بمستشفى حمد العام، قطر

الاعزاء مقدمي الرعاية للأطفال

نحن نقوم بعمل بحث للتعرف على الاكتئاب، وجودة الحياة والعوامل المصاحبة لها لدى مقدمي الرعاية للأطفال المصابين بالربو المتكررين على عيادات الأمراض الصدرية بمستشفى حمد العام. وهذه الاستبانة تتضمن عدد من الأسئلة التي تبحث عن مدى تأثير مرض الربو لدى الطفل/الطفلة على الحالة النفسية وجودة الحياة لدى مقدمي الرعاية لهم. سوف يساعدنا ذلك على تقديم برامج مختلفة لتحسين جودة الحياة لمقدمي الرعاية والحصول على تحكم أفضل في مرض الربو عند الأطفال.

لك الحق في الرفض على الاجابة على الاسئلة علما بان ذلك لن يؤثر على نوعية الرعاية المقدمة لطفلك. من فضلك حاول أن تجيب على كل الأسئلة الموجودة في هذا الاستبيان. لا يوجد خطأ أو صواب في هذه الأسئلة وإذا كانت هناك صعوبة في أي سؤال فيمكنك أن تستفسر من الشخص الذي يقوم بملء الاستمارة معك.

لا بد أن تتأكد أن المعلومات سوف تعامل بسرية تامة ولغرض البحث العلمي فقط.

نود أن نشكرك على تعاونك معنا في إتمام هذه الدراسة

للاستفسار:

د. فهد شيخان

dr.fahad\_@hotmail.com

الباحث الرئيسي

د. فهد شيخان

عن فريق البحث بقسم طب المجتمع

مؤسسة الرعاية الصحية الأولية
