# Supplementary material for: Quality of life among caregivers of asthmatic children attending pulmonology clinics at Hamad General Hospital, Qatar
Source: PubMed Central journal article supplement — SAGE Open Med. 2020 Nov 24;8:2050312120973500. doi: 10.1177/2050312120973500 (PMC7691908; doi:10.1177/2050312120973500), 2020-11-24
Supplement: sj-pdf-2-smo-10.1177_2050312120973500.pdf [file sj-pdf-2-smo-10.1177_2050312120973500.pdf]

## **Proposal**

**Depression, quality of life and its associated factors among caregivers of asthmatic children attending pulmonology clinics at Hamad General Hospital, Qatar.**

**Dear caregivers,**

**We are conducting a research to identify depression, quality of life and its associated factors among caregivers of asthmatic children attending pulmonology clinics at Hamad General Hospital. The questionnaire includes number of questions that investigate the impact of the child's asthma on the quality of life of their caregivers. This will help us develop different programs to better control asthma and to improve the quality of life of caregivers.**

**You have the right to refuse to answer the questions without affecting the quality of care provided to your child.**

**Please try to answer all the questions in the questionnaire. If there is any difficulty in any question, you can ask the person who fills out the form with you.**

**Be assured that the information will be treated strictly confidential and for the purpose of scientific research only.**

**We would like to thank you for your cooperation in completing this study.**

**Principle investigator**

**Dr. Fahad Shaikhan**

**Research team of community medicine section**

**Primary Health Care Corporation**

**For inquiries please contact**

**Dr. Fahad Shaikhan**

**Dr.fahad\_@hotmail.com**
