# Supplementary material for: Quality of life among caregivers of asthmatic children attending pulmonology clinics at Hamad General Hospital, Qatar
Source: PubMed Central journal article supplement — SAGE Open Med. 2020 Nov 24;8:2050312120973500. doi: 10.1177/2050312120973500 (PMC7691908; doi:10.1177/2050312120973500), 2020-11-24
Supplement: sj-pdf-3-smo-10.1177_2050312120973500.pdf [file sj-pdf-3-smo-10.1177_2050312120973500.pdf]

**الإكتتاب، وجودة الحياة بين مقدمي الرعاية للأطفال المصابين بداء الربو المترددين على عيادات الأمراض الصدرية بمستشفى حمد العام، قطر**

الرجاء الاجابة على الاسئلة التالية:

**أ- البيانات الخاصة بمقدمي الرعاية للأطفال المصابين بداء الربو**  
**\* البيانات الديموجرافية و الإجتماعية**

- 1.العمر بالسنوات: ☐
- 2.الجنس: 1.ذكر 2.انثى ☐
- 3.الحالة الاجتماعية: 1.اعزب 2.متزوج 3.مطلق 4.ارمل ☐
- 4.العلاقة بالطفل: 1.الام 2.الاب 3.الجدة 4.الجد 5.احد الاقارب 6.اخرى ☐
- 5.المستوى التعليمي: 1.غير متعلم او (يقرا ويكتب) 2.ابتدائي 3.اعدادي 4.ثانوي ☐
- 5.جامعي او اعلى ☐
- 6.الوظيفة: 1.لا يعمل 2.موظف اداري 3.حرفي 4.مهني 5.اعمال حرة 6.اخرى ☐
7. دخل الأسرة الكلي (بالريال القطري): ☐
- 8.عدد الأطفال: ☐
- 9.عدد الغرف في المنزل: ☐
- 10.مؤشر الزحام: ☐
- 11.عدد الاطفال المصابين بالربو (مشمولا الطفل الذي حضر الى العيادة اليوم) تحت رعايتك: ☐

**\* نمط الحياة**

**12.التدخين:**

هل تدخن اي نوع من انواع التبغ؟

- 1.مدخن منتظم (يدخن التبغ ولو مرة واحدة يوميا)  
2.مدخن احيانا (يدخن التبغ ولكن ليس بشكل يومي او ترك التدخين من فترة اقل من 6 اشهر)

3. تركت التدخين (لم يدخن اي شي منذ 6 اشهر عالاقل)

☐

4. لم ادخن مطلقا

13. النشاط البدني:

هل تمارس اي نشاط بدني؟

1. لا

2. قليلا (لا ينطبق على المجموعة رقم 3)

3. متوسط الى عالي (يمشي على الاقل 30 دقيقة في اليوم لمدة 5 ايام او اكثر في الاسبوع او يمارس نشاط حركي متوسط او عنيف لمدة 20 دقيقة لمدة 3 ايام او اكثر في الاسبوع)

☐

\* الحالة الصحية

نوعية الامراض المزمنة

2 : لا ☐

1: نعم ☐

14. داء الربو

2 : لا ☐

1: نعم ☐

15. الامراض التنفسية غير الربو

2 : لا ☐

1: نعم ☐

16. داء السكري

2 : لا ☐

1: نعم ☐

17. ضغط الدم

2 : لا ☐

1: نعم ☐

18. امراض القلب

2 : لا ☐

1: نعم ☐

19. اخرى

\* التاريخ الاسرى

2 : لا ☐

1: نعم ☐

20. هل لديك تاريخ اسري لمرض الربو

2 : لا ☐

1: نعم ☐

21. هل لديك تاريخ اسري لمرض الإكتئاب

## \*البيانات الخاصة بالاطفال المصابين بداء الربو

☐

22.العمر بالسنوات:

☐

2.انثى

1.ذكر

23.الجنس:

☐

3.اعدادي

2.ابتدائي

2.روضة

1.حضانة

24.المستوى التعليمي:

☐

25.مدة الإصابة بمرض الربو:

☐

3.الأخير

2.في الوسط

1.الأول

26.ترتيب الطفل بين إخوته:

## مقياس بيك للاكتئاب

تتضمن هذه القائمة 21 مجموعة من العبارات.المطلوب منك قراءة كل مجموعة على حدة وبغاية ثم تختار من كل منها عبارة واحدة فقط.تصف بطريقة أفضل مشاعرك فالاسبوعين المنصرمين بما في ذلك اليوم.إذا تبين لك ان اكثر من عبارة تنطبق عليك بصورة متساوية اختر اعلى رقم في هذه المجموعة.تأكد انك تختار عبارة واحدة فقط من كل مجموعة حتى المجموعة رقم 32 المتعلقة ب (تغيرات في نمط النوم) والمجموعة رقم 34 المتعلقة ب (تغيرات في الشهية).

## 27.الحزن

- 1- لا أشعر بالحزن
- 2- أنا حزين معظم الوقت.
- 3- أنا حزين طيلة الوقت.
- 4- أنا حزين جدا او غير سعيد لدرجة لا تحتمل

☐

## 28.التشاؤم

- 1- لست متشائما بشأن مستقبلي
- 2- أشعر بتشاؤم بشأن مستقبلي أكثر من المعتاد.
- 3- لا أتوقع أن الأمور ستجري كما أريد.
- 4- أشعر أن مستقبلي لا أمل فيه أو أنه سيزداد سوءا.

☐

## 29.الفشل السابق

- 1- لا أشعر بأني شخص فاشل.
- 2- لقد فشلت أكثر مما يجب.
- 3- عندما أنظر لحياتي في السابق أجدها مليئة بالفشل.
- 4- أشعر أنني شخص فاشل تماما.

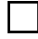

### 30. فقدان المتعة

- 1- أحصل على نفس القدر من المتعة التي كنت أحصل عليها من الأشياء التي أستمتع بها.
- 2- لا أستمتع بالأشياء بنفس القدر الذي اعتدت عليه.
- 3- أحصل على قدر قليل جدا من المتعة بالأشياء مما تعودت عليه من قبل.
- 4- لا أستطيع أن أحصل على أي متعة من الأشياء التي اعتدت أن أستمتع بها.

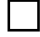

### 31. مشاعر الذنب

- 1- لا أشعر بالذنب.
- 2- أشعر بالذنب على الكثير من الأشياء التي عملتها أو التي كان يجب أن أعملها.
- 3- أشعر بالذنب في معظم الأوقات.
- 4- أشعر بالذنب دائما.

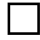

### 32. مشاعر العقاب

- 1- أنا لا أشعر بأنني أعاقب.
- 2- أشعر بأنني ربما أعاقب.
- 3- أتوقع بأنني سأعاقب فعلا.
- 4- أشعر أنني أعاقب الآن.

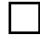

### 33. عدم حب الذات

- 1- أشعر بشأن ذاتي كما كنت أشعر دائما.
- 2- لقد فقدت الثقة.
- 3- أنا خائب الأمل في نفسي.
- 4- أنا أكره نفسي.

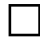

### 34. نقد الذات ولومها

- 1- لا أنتقد نفسي أو ألومها أكثر من المعتاد.
- 2- أنا أكثر انتقادا لنفسي من السابق.
- 3- أنتقد نفسي على جميع أخطائي.
- 4- ألوم نفسي على كل شيء سيء يحدث.

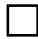

### 35. الأفكار أو الرغبات الانتحارية

- 1- ليست لدي أي أفكار لقتل نفسي.
- 2- لدي أفكار لقتل نفسي ولكنني لن أنفذها.
- 3- أرغب في قتل نفسي.
- 4- سأقتل نفسي إن سنحت لي الفرصة.

☐

### 36. البكاء

- 1- لا أبكي أكثر من المعتاد.
- 2- أبكي أكثر من المعتاد.
- 3- أبكي لأبسط الأشياء.
- 4- أرغب في البكاء ولكن لم يعد باستطاعتي أن أبكي.

☐

### 37. التهيج

- 1- ألسنت متوترا او منزعجا اكثر من المعتاد.
- 2- أشعر بأنني أكثر توترا او انزعاجا من المعتاد.
- 3- أنا منزعج جدا او متهيج جدا حتى أنه من الصعب أن أبقى ساكناً.
- 4- أنا منزعج جدا او متهيج جدا حتى يجب ان ابقى متحركا او افعل شيئا ما.

☐

### 38. فقدان الاهتمام

- 1- لم أفقد الاهتمام بالآخرين أو بالممارسات اليومية والأنشطة.
- 2- أنا أقل اهتماما بالآخرين أو بالأشياء من السابق.
- 3- فقدت معظم اهتمامي بالآخرين أو بالأشياء.
- 4- أجد أنه من الصعوبة الاهتمام بأي شيء.

☐

### 39. التردد (عدم القدرة على اتخاذ القرار)

- 1- اتخذ القرارات بنفس الكفاءة التي كنت عليها دائما.
- 2- أجد صعوبة أكثر من المعتاد في اتخاذ القرارات.
- 3- أجد صعوبة كبيرة في اتخاذ القرارات.
- 4- أعجز تماما عن اتخاذ أي قرار.

☐

### 40. إنعدام القيمة

- 1- أنا لا أشعر بأنني عديم القيمة.
- 2- أنا لا أعتبر نفسي ذا قيمة وذا فائدة كالمعتاد.
- 3- أشعر بالكثير من عدم القيمة مقارنة بالآخرين.
- 4- أشعر بأنني عديم القيمة تماما.

☐

### 41. فقدان الطاقة

- 1- لدي نفس القدر المعتاد من الطاقة.
- 2- لدي طاقة أقل من المعتاد.
- 3- ليس لدي الطاقة الكافية لعمل الكثير من الأشياء.
- 4- ليس لدي الطاقة الكافية لعمل أي شيء.

☐

#### 42. التغيرات في نمط النوم

- 1- لم أعان من أي تغير في نمط نومي.
2. أ أنام أكثر من المعتاد بعض الشيء .
- 2.ب أنام أقل من المعتاد بعض الشيء.
- 3.أ أنام أكثر من المعتاد بكثير.
- 3.ب أنام أقل من المعتاد بكثير
4. أ أنام معظم اليوم.
4. ب أستيقظ مبكرا بساعة أو ساعتين ولا أستطيع العودة إلى النوم.

☐

#### 43. قابلية الاستثارة

- 1- لست أكثر استثارة من المعتاد.
- 2- أنا أكثر استثارة من المعتاد.
- 3- أنا أكثر استثارة بكثير من المعتاد.
- 4- أنا مستثار طيلة الوقت.

☐

#### 44. التغيرات في الشهية

1. لم أعان من أي تغير في شهيتي.
- 2.أ. شهيتي أقل من المعتاد بعض الشيء.
- 2.ب شهيتي أكبر بكثير من المعتاد.
3. أ . شهيتي أقل بكثير من السابق.
- 3.ب. شهيتي أكبر بكثير من المعتاد.
4. أ. ليس لدي شهية بتاتا.
- 4.ب. أتناول الطعام طيلة الوقت.

☐

#### 45. صعوبة التركيز

- 1- أستطيع التركيز كما كنت دائما.
- 2- لا أستطيع التركيز بدقة كالمعتاد.
- 3- من الصعب أن أركز في شيء لمدة طويلة جدا.
- 4- أجد أنني لا أستطيع أن أركز على أي شيء.

☐

#### 46. التعب أو الإرهاق

- 1- لست متعبا او مرهقا أكثر من المعتاد.
- 2- اصبحت متعبا او مرهقا أكثر من المعتاد.
- 3- أنا متعب جدا أو مرهق لدرجة أنني لا أستطيع القيام بالأعمال التي اعتدت عليها.
- 4- أنا متعب جدا عليها او مرهق لدرجة أنني لا أستطيع أن أنجز معظم الأشياء التي اعتدت ان أنجزها.

☐

**47. فقدان الاهتمام بالجنس (الرغبة الجنسية)**

- 1- لم ألاحظ أي تغيرات حديثة في اهتماماتي الجنسية.
- 2- إنني أقل اهتماما بالأمور الجنسية مما كنت عليه من قبل.
- 3- أنا الآن أقل اهتماما بالأمور الجنسية بشكل كبير.
- 4- لقد فقدت اهتمامي بالأمور الجنسية.

☐☐

**48. المجموع الكلي لمقياس الاكتئاب**

**استبيان جودة الحياة لدى مقدمي الرعاية للأطفال المصابين بداء الربو**

هذا الاستبيان قد صمم لكتشف كيف كانت حالتك خلال الأسبوع الماضي. نريد ان نعرف الطرق التي تسبب داء الربو فيها في الاخلال بنشاطاتك اليومية الاعتيادية ومدى تأثيره في شعورك. الرجاء اختيار عبارة واحدة فقط من كل سؤال

**49. خلال الأسبوع الماضي، كم مرة شعرت بالعجز أو الخوف عندما عانى طفلك من الكحة، الصفير (الزيز)، أو ضيق النفس؟**

1. كل الأوقات
2. معظم الأوقات
3. كثير من الأحيان
4. بعض الأحيان
5. نادرا
6. نادر جدا
7. أبدا

☐

**50. خلال الأسبوع الماضي، كم مرة تسبب داء الربو لدى طفلك في تغيير خطط عائلتك؟**

1. كل الأوقات
2. معظم الأوقات
3. كثير من الأحيان
4. بعض الأحيان
5. نادرا
6. نادر جدا
7. أبدا

☐

**51. خلال الأسبوع الماضي، كم مره شعرت بالاحباط أو نفاذ الصبر لأن طفلك كان مهتاجا بسبب داء الربو؟**

1. كل الأوقات
2. معظم الأوقات
3. كثير من الأحيان
4. بعض الأحيان
5. نادرا
6. نادر جدا
7. أبدا

☐

**52. خلال الأسبوع الماضي، كم مرة تعارض داء الربو عند طفلك مع عملك أو شغلك في أنحاء منزلك؟**

1. كل الأوقات
2. معظم الأوقات
3. كثير من الأحيان
4. بعض الأحيان
5. نادرا
6. نادر جدا
7. أبدا

☐

53. خلال الأسبوع الماضي، كم مرة شعرت بالاضطراب بسبب الكحة، الصفير (ازيز)، أو ضيق النفس لدى طفلك؟

1. كل الأوقات 2. معظم الأوقات 3. كثير من الأحيان 4. بعض الأحيان 5. نادرا 6. نادر جدا 7. أبدا

☐

54. خلال الأسبوع الماضي، كم مرة لم تتمكن من النوم بالليل بسبب داء الربو لدى طفلك؟

1. كل الأوقات 2. معظم الأوقات 3. كثير من الأحيان 4. بعض الأحيان 5. نادرا 6. نادر جدا 7. أبدا

☐

55. خلال الأسبوع الماضي، كم مرة كنت منزعجا لأن داء الربو عند طفلك تعارض مع العلاقات الأسرية؟

1. كل الأوقات 2. معظم الأوقات 3. كثير من الأحيان 4. بعض الأحيان 5. نادرا 6. نادر جدا 7. أبدا

☐

56. خلال الأسبوع الماضي، كم مرة تسبب داء الربو عند طفلك في استيقاظك من النوم أثناء الليل؟

1. كل الأوقات 2. معظم الأوقات 3. كثير من الأحيان 4. بعض الأحيان 5. نادرا 6. نادر جدا 7. أبدا

☐

57. خلال الأسبوع الماضي، كم مرة شعرت بالغضب بسبب إصابة طفلك بداء الربو؟

1. كل الأوقات 2. معظم الأوقات 3. كثير من الأحيان 4. بعض الأحيان 5. نادرا 6. نادر جدا 7. أبدا

☐

58. خلال الأسبوع الماضي، كم كنت قلقا أو مهتما بخصوص أداء طفلك لنشاطاته اليومية الاعتيادية؟

1. قلق أو مهتم جدا جدا 2. قلق أو مهتم جدا 3. قلق أو مهتم بشكل مقبول 4. قلق أو مهتم الى حد ما 5. قلق أو مهتم

6. بالكاد يكون قلقا أو مهتما 7. ليس قلقا أو مهتما

☐

59. خلال الأسبوع الماضي، كم كنت قلقاً أو مهتماً بخصوص أدوية داء الربو لطفلك وأعراضها الجانبية؟

1. قلق أو مهتم جداً 2. قلق أو مهتم جداً 3. قلق أو مهتم بشكل مقبول 4. قلق أو مهتم الى حد ما 5. قلق أو مهتم قليلاً  
6. بالكاد يكون قلقاً أو مهتماً 7. ليس قلقاً أو مهتماً

☐

60. خلال الأسبوع الماضي، كم كنت قلقاً أو مهتماً بخصوص حمايتك المفرطة لطفلك؟

1. قلق أو مهتم جداً 2. قلق أو مهتم جداً 3. قلق أو مهتم بشكل مقبول 4. قلق أو مهتم الى حد ما 5. قلق أو مهتم قليلاً  
6. بالكاد يكون قلقاً أو مهتماً 7. ليس قلقاً أو مهتماً

☐

61. خلال الأسبوع الماضي، كم كنت قلقاً أو مهتماً بخصوص كون طفلك قادراً على ممارسة حياته بصورة طبيعية؟

1. قلق أو مهتم جداً 2. قلق أو مهتم جداً 3. قلق أو مهتم بشكل مقبول 4. قلق أو مهتم الى حد ما 5. قلق أو مهتم قليلاً  
6. بالكاد يكون قلقاً أو مهتماً 7. ليس قلقاً أو مهتماً

☐

### أداة التواصل والسيطرة على ربو الاطفال

الرجاء اختيار اجابة واحدة من الاجابات الاتية  
62. مقياس الاتجاه.

منذ آخر زيارة لطفلك الى هذه العيادة، كيف كانت حالة الربو لدى طفلك؟

☐ 0: أفضل

☐ 1: نفسه

☐ 2 : اسوأ

إذا لم يتم طفلك بزيارة طبيب، الرجاء الاجابة عن الشهرين الماضيين  
63. مقياس مدى الانزعاج

منذ آخر زيارة لطفلك الى هذه العيادة، كم كنت منزعجاً بسبب الربو لدى طفلك؟

☐ 0: غير منزعج

☐ 1: منزعج بعض الشيء

☐ 2: منزعج جداً

إذا لم يقم طفلك بزيارة طبيب الرجاء الاجابة عن الشهرين الماضي

64-66. مقياس مدى الخطر:

منذ اخر زيارة لطفلك الى هذه العيادة

إذا لم يقم طفلك بزيارة طبيب الرجاء الاجابة عن الشهرين الماضيين

64. هل ذهب للطوارئ بسبب الربو

☐ لا :0 ☐ نعم :1

65. هل تم تنويمه بالمستشفى بسبب الربو ؟

☐ لا :0 ☐ نعم :1

66. هل استخدم دواء الكورتيزون او مشتقاته بسبب الربو

☐ لا :0 ☐ نعم :1

67. مقياس مدى نسيان اخذ الدواء

كم عدد المرات التي تنسى فيها اعطاء طفلك ادوية الربو اليومية عندما تكون حالته جيدة؟

ادوية الربو اليومية يتضمن: البخاخات (مثل باديسونايد , بولميكورت , سينجيولير , سيمبيكورت)

4: كل الاوقات (5-7 ايام/ الاسبوع) ☐ 3: معظم الاوقات (3-4 ايام/ الاسبوع) ☐ 2: بعض الاوقات (1-2 ايام/ الاسبوع) ☐

1: ابدا ☐ 0 : طفلي لا ينبغي ان ياخذ ادوية ربو يومية ☐

68. مقياس اعراض الربو

خلال الاسبوع الماضي, كم يوما كانت اعراض الربو موجودة لدى طفلك؟ على سبيل المثال (كحة - ضيق في الصدر - ضيق في

التنفس - بصاق) رذاذ, مخاط, بلغم مع الكحة) - صعوبة اخذ نفس عميق - صوت تصفير او ازيز في الصدر)

☐ 4 : كل يوم (طوال اليوم) ☐ 3 : كل يوم (ليس طوال اليوم) ☐ 2 : 3-6 يوم ☐ 1 : 1-2 يوم ☐ 0 : 0 (لم يحدث)

69. مقياس مدى استخدام مزيلات الربو

خلال الاسبوع الماضي, كم يوما كان عليك اعطاء طفلك الادوية بسرعة لتخفيف اعراض الربو؟ على سبيل المثال

(مثال فينتولين عن طريق الاستنشاق إبخاخ امضخة )

☐ ☐ ☐ ☐ ☐  
4 : كل يوم (طوال اليوم) 3 : كل يوم (ليس طوال اليوم) 2 : 3-6 يوم 1 : 1-2 يوم 0 : 0 (لم يحدث)

70. مقياس حدوث الازمات.

خلال الاسبوع الماضي, كم يوما تعرض طفلك لازمة ريو؟ على سبيل المثال: ( عندما يجد طفلك صعوبة في التنفس - عندما تعطي طفلك دواء ريو سريعة أكثر (مثال: الفينتولين) - عندما لا تعطي ادوية الريو مفعولا )

☐ ☐ ☐ ☐  
3 : 4-7 يوم 2 : 3-2 يوم 1 : 1 يوم 0 : 0 (لم يحدث)

71. مقياس الحد من النشاط

خلال الاسبوع الماضي, كم حد الريو من نشاط طفلك؟

☐ ☐ ☐ ☐ ☐  
4 : تماما 3 : كثيرا 2 : بشكل معتدل 1 : قليلا 0 : على الاطلاق

72. مقياس الأعراض في اوقات الليل

خلال الاسبوعين الماضيين , كم ليلة تسبب الريو لدى طفلك في منع طفلك من النوم او ايقاظه/يقاظها من النوم؟

☐ ☐ ☐ ☐ ☐  
4 : 8-14 3 : 4-7 2 : 2-3 1 : 1 0 : 0 (لم يحدث)

☐

73. درجة التحكم بالرئو الكلية (69-73)

شكرا لحسن تعاونكم
